# Supplementary material for: The evolutionary history of Stomatopoda (Crustacea: Malacostraca) inferred from molecular data
Source: PeerJ journal article supplement (doi:10.7717/peerj.3844), 2017-09-21
Supplement: Supplementary_1.pdf [file Supplementary_1.pdf]

**A.**

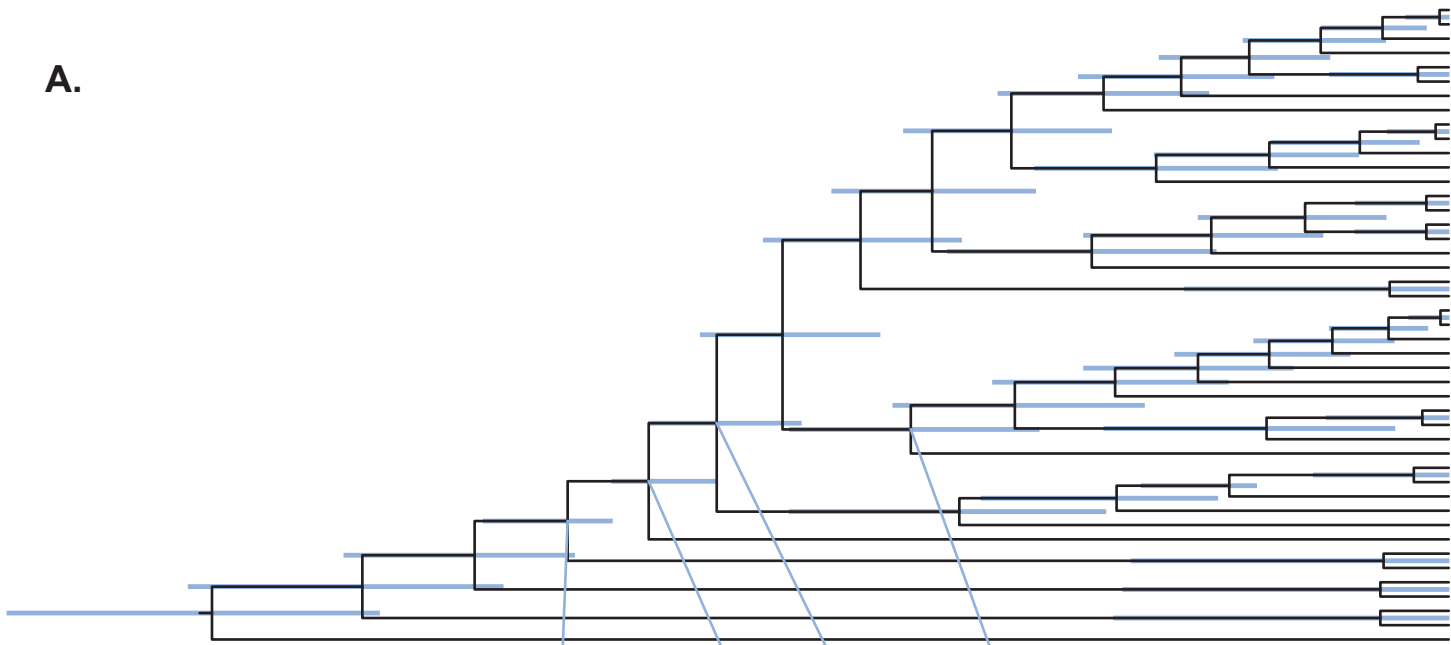

**B.**

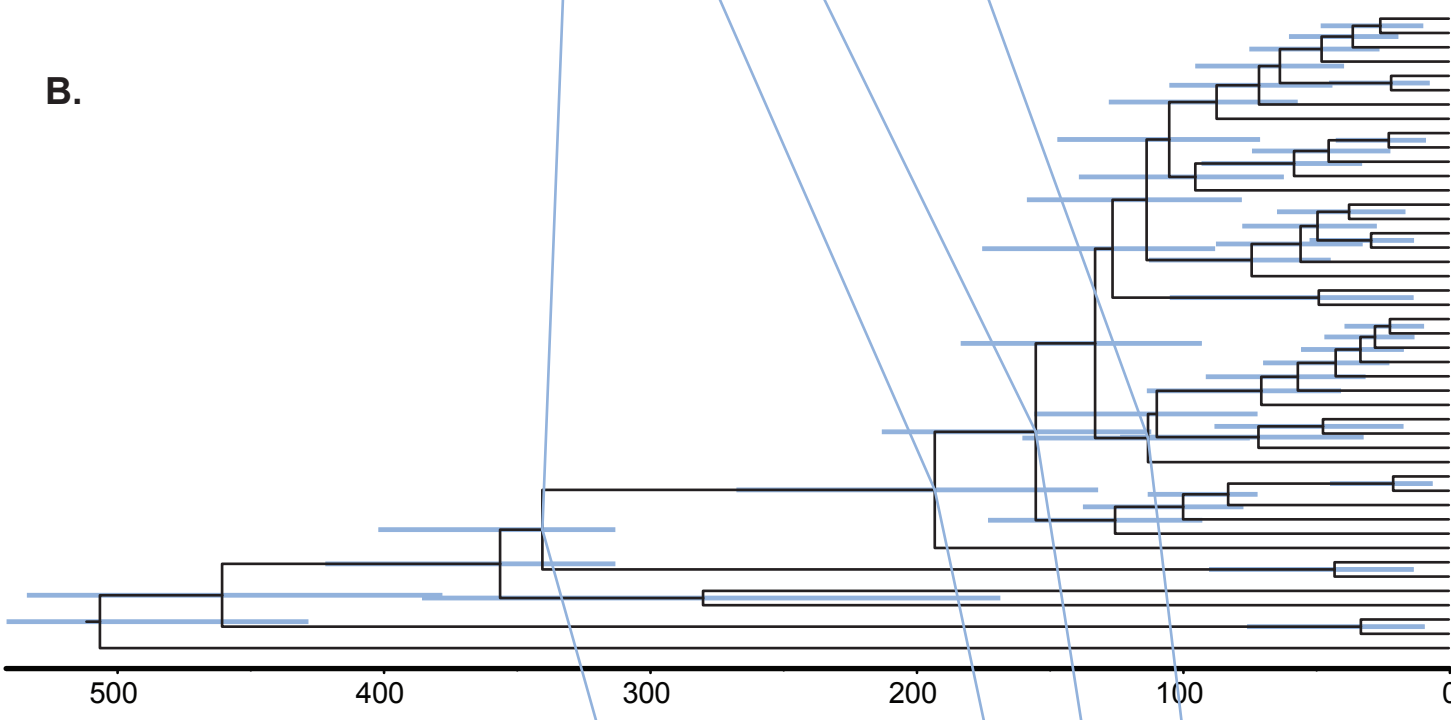

**C.**

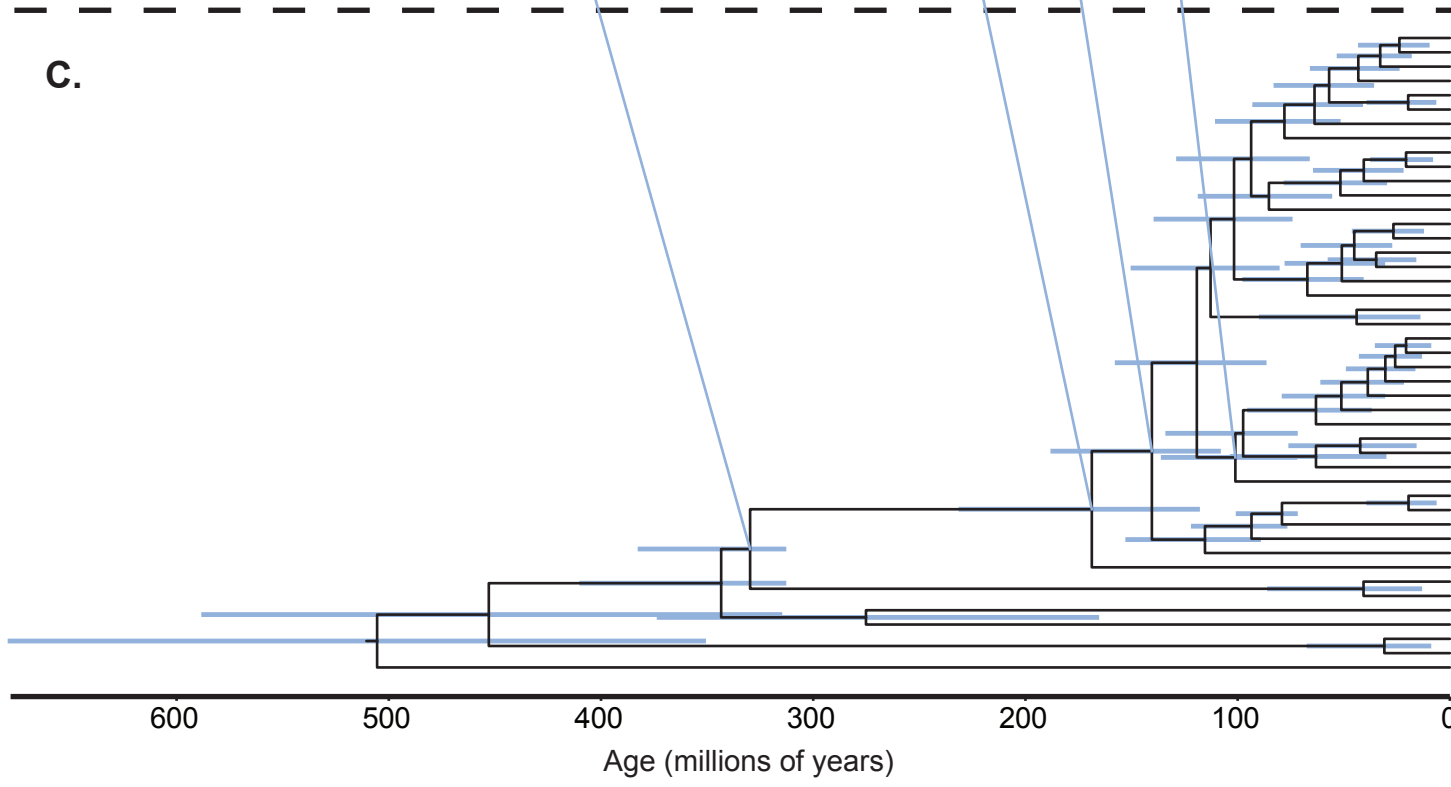

Age (millions of years)
